# Supplementary material for: miR-146a modulates TLR1/2 and 4 induced inflammation and links it with proliferation and lipid production via the indirect regulation of GNG7 in human SZ95 sebocytes
Source: PubMed Central journal article supplement (PMC8563942; doi:10.1038/s41598-021-00907-1), 2021-11-02
Supplement: 41598_2021_907_MOESM1_ESM.pdf [file 41598_2021_907_MOESM1_ESM.pdf]

# **miR-146a modulates TLR1/2 and 4 induced inflammation and links it with proliferation and lipid production via the indirect regulation of GNG7 in human SZ95 sebocytes**

Katalin Dull MSc PhD<sup>1</sup>, Fruzsina Fazekas MSc<sup>1</sup>, Dávid Deák MSc<sup>1</sup>, Dóra Kovács MSc PhD<sup>1</sup>, Szilárd Póliska MSc PhD<sup>2</sup>, Andrea Szegedi MD PhD<sup>1,3</sup>, Christos C Zouboulis MD PhD<sup>4</sup>, Dániel Törőcsik MD PhD<sup>1</sup>

<sup>1</sup> Department of Dermatology, Faculty of Medicine, University of Debrecen, Debrecen, Hungary

<sup>2</sup> Department of Biochemistry and Molecular Biology, Genomic Medicine and Bioinformatics Core Facility, Faculty of Medicine, University of Debrecen, Debrecen, Hungary

<sup>3</sup> Division of Dermatological Allergology, Department of Dermatology, Faculty of Medicine, University of Debrecen, Debrecen, Hungary

<sup>4</sup> Departments of Dermatology, Venereology, Allergology and Immunology, Dessau Medical Center, Brandenburg Medical School Theodor Fontane and Faculty of Health Sciences Brandenburg, Dessau, Germany

Correspondence: Dániel Törőcsik MD PhD. Department of Dermatology. Faculty of Medicine. University of Debrecen. Debrecen. Hungary; H-4032 Nagyerdei krt. 98.

Telephone: +36 52 255 602

Fax: +36 52 255 736

Email: dtorocsik@gmail.com

**Supplementary table 1A. Upregulated miRNAs in TLR1/2 (PAM3CSK4) and TLR4 activated (LPS) SZ95 sebocytes.**

FC: fold-change value

| <b>LPS 24h</b>          |                |           | <b>PAM3CSK4 24h</b>     |                |           |
|-------------------------|----------------|-----------|-------------------------|----------------|-----------|
| <b>Accession number</b> | <b>p-value</b> | <b>FC</b> | <b>Accession number</b> | <b>p-value</b> | <b>FC</b> |
| hsa-miR-146a-5p         | 7.64E-03       | 2.60      | hsa-miR-125b-5p         | 1.91E-03       | 2.54      |
| hsa-miR-34a-3p          | 2.99E-02       | 2.40      | hsa-miR-146a-5p         | 1.46E-02       | 2.43      |
| hsa-miR-4517            | 6.19E-03       | 2.05      | hsa-miR-100-5p          | 1.55E-02       | 2.15      |
| hsa-miR-3613-5p         | 4.30E-04       | 1.94      | hsa-miR-4517            | 7.48E-04       | 2.02      |
| hsa-miR-193b-5p         | 2.59E-03       | 1.76      | hsa-miR-99a-5p          | 1.89E-03       | 2.02      |
| hsa-miR-31-3p           | 3.43E-02       | 1.75      | hsa-miR-2355-5p         | 1.47E-02       | 1.90      |
| hsa-miR-29b-1-5p        | 3.57E-03       | 1.71      | hsa-miR-99b-5p          | 1.11E-02       | 1.77      |
| hsa-miR-582-5p          | 1.70E-02       | 1.70      | hsa-miR-3613-5p         | 4.54E-03       | 1.68      |
| hsa-miR-92a-1-5p        | 1.81E-02       | 1.69      | hsa-miR-29b-1-5p        | 4.81E-02       | 1.67      |
| hsa-miR-326             | 7.06E-03       | 1.67      | hsa-miR-33a-3p          | 1.14E-02       | 1.64      |
| hsa-miR-22-5p           | 2.67E-03       | 1.67      | hsa-miR-147b            | 4.23E-02       | 1.62      |
| hsa-miR-190a            | 1.20E-02       | 1.65      | hsa-miR-22-5p           | 8.95E-03       | 1.52      |
| hsa-miR-455-3p          | 2.14E-02       | 1.58      | hsa-miR-200a-3p         | 2.17E-03       | 1.49      |
| hsa-miR-2355-5p         | 1.10E-05       | 1.56      | hsa-miR-18a-5p          | 3.34E-02       | 1.48      |
| hsa-miR-135b-3p         | 5.98E-03       | 1.54      | hsa-miR-190a            | 2.33E-02       | 1.47      |
| hsa-miR-34a-5p          | 1.59E-02       | 1.54      | hsa-miR-501-3p          | 5.49E-03       | 1.46      |
| hsa-miR-106b-5p         | 4.45E-05       | 1.52      | hsa-miR-24-3p           | 2.16E-02       | 1.46      |
| hsa-miR-18a-5p          | 2.39E-02       | 1.52      | hsa-miR-106b-5p         | 1.75E-02       | 1.45      |
| hsa-miR-21-3p           | 4.38E-03       | 1.51      | hsa-miR-135b-5p         | 4.81E-02       | 1.43      |
| hsa-miR-323a-3p         | 3.28E-02       | 1.51      | hsa-miR-23b-3p          | 4.55E-02       | 1.41      |
| hsa-miR-16-5p           | 4.23E-02       | 1.50      | hsa-miR-16-5p           | 4.82E-02       | 1.38      |
| hsa-miR-26a-2-3p        | 2.80E-04       | 1.49      | hsa-miR-339-5p          | 3.12E-02       | 1.35      |
| hsa-miR-138-5p          | 3.64E-02       | 1.49      | hsa-miR-3912            | 4.07E-02       | 1.32      |
| hsa-miR-99a-5p          | 1.63E-02       | 1.45      |                         |                |           |
| hsa-miR-147b            | 1.56E-02       | 1.45      |                         |                |           |
| hsa-miR-27a-3p          | 5.76E-03       | 1.45      |                         |                |           |
| hsa-miR-4677-3p         | 2.68E-02       | 1.45      |                         |                |           |
| hsa-miR-651             | 1.16E-03       | 1.44      |                         |                |           |
| hsa-miR-23a-3p          | 5.93E-03       | 1.44      |                         |                |           |
| hsa-miR-20a-5p          | 2.08E-02       | 1.44      |                         |                |           |
| hsa-miR-542-3p          | 2.80E-02       | 1.42      |                         |                |           |
| hsa-miR-342-3p          | 8.95E-03       | 1.41      |                         |                |           |
| hsa-miR-19b-3p          | 3.76E-02       | 1.40      |                         |                |           |
| hsa-miR-200c-3p         | 3.94E-03       | 1.40      |                         |                |           |
| hsa-miR-339-5p          | 7.56E-03       | 1.39      |                         |                |           |
| hsa-miR-671-5p          | 1.02E-02       | 1.38      |                         |                |           |
| hsa-miR-26b-3p          | 2.55E-02       | 1.37      |                         |                |           |
| hsa-miR-19a-3p          | 2.71E-02       | 1.36      |                         |                |           |
| hsa-miR-23b-3p          | 1.53E-02       | 1.36      |                         |                |           |
| hsa-miR-30e-5p          | 1.03E-02       | 1.36      |                         |                |           |
| hsa-miR-15b-5p          | 2.03E-02       | 1.36      |                         |                |           |
| hsa-let-7b-5p           | 8.64E-03       | 1.35      |                         |                |           |
| hsa-miR-487b            | 3.63E-02       | 1.35      |                         |                |           |
| hsa-miR-548k            | 1.01E-02       | 1.34      |                         |                |           |
| hsa-miR-589-5p          | 2.15E-02       | 1.33      |                         |                |           |
| hsa-let-7f-2-3p         | 2.65E-02       | 1.33      |                         |                |           |
| hsa-miR-193b-3p         | 3.77E-03       | 1.32      |                         |                |           |
| hsa-miR-29c-3p          | 3.18E-02       | 1.31      |                         |                |           |
| hsa-miR-126-5p          | 1.20E-02       | 1.31      |                         |                |           |
| hsa-miR-30a-5p          | 3.24E-03       | 1.31      |                         |                |           |
| hsa-miR-424-5p          | 9.34E-03       | 1.31      |                         |                |           |
| hsa-miR-21-5p           | 2.19E-02       | 1.31      |                         |                |           |
| hsa-miR-98              | 1.97E-02       | 1.31      |                         |                |           |
| hsa-miR-26b-5p          | 2.09E-02       | 1.30      |                         |                |           |

**Supplementary table 1B. Downregulated miRNAs in TLR1/2 (PAM3CSK4) and TLR4 activated (LPS) SZ95 sebocytes.**

FC: fold-change value

**LPS 24h**

| <b>Accession number</b> | <b>p-value</b> | <b>FC</b> |
|-------------------------|----------------|-----------|
| hsa-miR-486-3p          | 1.69E-02       | -1.33     |
| hsa-miR-3065-5p         | 1.06E-02       | -1.36     |
| hsa-miR-454-5p          | 3.05E-02       | -1.44     |

**PAM3CSK4 24h**

| <b>Accession number</b> | <b>p-value</b> | <b>FC</b> |
|-------------------------|----------------|-----------|
| hsa-miR-532-3p          | 3.36E-02       | -1.33     |
| hsa-miR-1304-3p         | 4.67E-02       | -1.35     |
| hsa-miR-3605-3p         | 2.78E-02       | -1.77     |
| hsa-miR-628-3p          | 3.82E-02       | -1.78     |

**Supplementary table 2A. Significantly upregulated mRNAs in miR-146a inhibitor treated SZ95 sebocytes (72 hours)**

FC: fold-change value

| <b>Gene symbol</b> | <b>p-value</b> | <b>FC</b> | <b>Gene symbol</b> | <b>p-value</b> | <b>FC</b> |
|--------------------|----------------|-----------|--------------------|----------------|-----------|
| CLEC7A             | 4.46E-03       | 5.26      | LINC00035          | 2.47E-02       | 1.97      |
| C21orf88           | 4.32E-03       | 4.86      | CLDN16             | 2.35E-02       | 1.92      |
| SUMO4              | 2.72E-03       | 4.46      | RASD2              | 3.11E-02       | 1.92      |
| GNG7               | 8.02E-03       | 3.98      | CD37               | 6.18E-03       | 1.91      |
| LRRTM2             | 4.29E-05       | 3.82      | CYP4B1             | 5.69E-04       | 1.91      |
| COL1A2             | 2.89E-03       | 3.81      | RP11-404P21.8      | 4.90E-02       | 1.90      |
| SLC6A14            | 5.89E-04       | 3.47      | SIRT4              | 1.40E-02       | 1.89      |
| SPINK1             | 3.74E-03       | 3.41      | ACKR4              | 8.52E-03       | 1.89      |
| LMO3               | 1.02E-03       | 3.35      | PDE6A              | 3.43E-02       | 1.88      |
| RNF157-AS1         | 3.13E-02       | 3.09      | AKR1C1             | 4.39E-02       | 1.87      |
| AC135178.1         | 4.62E-02       | 3.04      | GPR114             | 1.34E-02       | 1.86      |
| FOXF1              | 1.07E-02       | 2.96      | SERPINA3           | 4.35E-02       | 1.84      |
| MCF2L              | 1.77E-02       | 2.84      | CCDC146            | 3.47E-02       | 1.80      |
| COL4A3             | 1.17E-02       | 2.83      | AC002365.1         | 2.80E-02       | 1.80      |
| LINC00551          | 7.14E-03       | 2.78      | LRRC69             | 3.16E-02       | 1.79      |
| NCALD              | 9.92E-03       | 2.74      | ACSL6              | 9.49E-04       | 1.78      |
| PIGR               | 3.77E-02       | 2.61      | ANGPTL2            | 6.53E-03       | 1.78      |
| SULT1E1            | 6.61E-03       | 2.60      | UGT1A6             | 4.28E-02       | 1.78      |
| KIAA1024           | 2.36E-02       | 2.58      | NWD1               | 3.98E-02       | 1.77      |
| DUSP13             | 4.66E-03       | 2.53      | PLEKHD1            | 4.93E-02       | 1.77      |
| CD177              | 2.04E-02       | 2.52      | WDR88              | 2.89E-03       | 1.77      |
| COLEC10            | 2.98E-02       | 2.50      | LRRC19             | 4.49E-02       | 1.76      |
| C4BPB              | 6.50E-03       | 2.46      | BTBD8              | 3.84E-02       | 1.76      |
| PSG2               | 1.06E-02       | 2.45      | SHE                | 4.94E-02       | 1.76      |
| ARL14EPL           | 3.94E-02       | 2.42      | PPIAL4C            | 6.69E-04       | 1.74      |
| PDE7B              | 7.31E-03       | 2.41      | CALHM3             | 3.93E-02       | 1.74      |
| PPP1R32            | 4.13E-04       | 2.39      | PLLP               | 1.04E-02       | 1.73      |
| MYO1H              | 2.57E-02       | 2.36      | STAC2              | 1.30E-02       | 1.73      |
| RSF1-IT2           | 2.53E-02       | 2.31      | ALPPL2             | 4.95E-02       | 1.72      |
| AL355490.1         | 4.08E-02       | 2.30      | SLCO4C1            | 9.24E-03       | 1.71      |
| C11orf16           | 1.25E-02       | 2.28      | INSL4              | 4.34E-02       | 1.70      |
| ARID4B-IT1         | 1.44E-02       | 2.23      | SEMA5A             | 1.40E-02       | 1.70      |
| NIM1               | 3.43E-03       | 2.23      | WDR72              | 4.53E-04       | 1.69      |
| BIRC7              | 1.62E-02       | 2.21      | PRUNE2             | 4.27E-02       | 1.67      |
| SAA4               | 4.82E-02       | 2.21      | DHRS9              | 4.88E-02       | 1.66      |
| FRMPD2             | 4.35E-02       | 2.20      | NEBL               | 2.72E-02       | 1.66      |
| CD207              | 4.04E-02       | 2.17      | MAPK10             | 3.60E-02       | 1.66      |
| OR51B2             | 1.13E-02       | 2.15      | IGDCC4             | 4.14E-02       | 1.65      |
| SEMA6D             | 4.59E-02       | 2.14      | CAPN11             | 4.30E-03       | 1.65      |
| MLANA              | 2.12E-02       | 2.12      | CDKL5              | 4.04E-02       | 1.64      |
| C1QTNF5            | 7.71E-04       | 2.10      | ERI3-IT1           | 4.89E-02       | 1.63      |
| MFRP               | 7.71E-04       | 2.10      | TOMM20L            | 1.49E-02       | 1.63      |
| ANG                | 1.05E-02       | 2.10      | BNIP1L             | 4.56E-03       | 1.63      |
| TNFRSF8            | 2.93E-02       | 2.09      | CST5               | 3.90E-02       | 1.62      |
| GLIPR1L1           | 4.06E-02       | 2.09      | PADI2              | 4.95E-02       | 1.60      |
| SCARNA13           | 1.81E-02       | 2.06      | LINGO2             | 2.01E-02       | 1.60      |
| UBOX5-AS1          | 2.19E-02       | 2.06      | C17orf72           | 2.36E-02       | 1.60      |
| LRRC10B            | 3.54E-02       | 2.05      | TFF2               | 2.55E-02       | 1.58      |
| FRRS1L             | 3.13E-02       | 2.05      | TMEM45B            | 1.13E-02       | 1.58      |
| FRMPD3             | 2.62E-02       | 1.99      | SNORD69            | 1.80E-02       | 1.57      |
| OXCT1-AS1          | 4.51E-02       | 1.99      | MIR7-3HG           | 5.00E-02       | 1.57      |

| <b>Gene symbol</b> | <b>p-value</b> | <b>FC</b> |
|--------------------|----------------|-----------|
| GRTP1-AS1          | 2.83E-02       | 1.56      |
| RAB9B              | 2.99E-03       | 1.56      |
| ANKRD24            | 4.50E-03       | 1.56      |
| AQP3               | 6.97E-03       | 1.55      |
| EQTN               | 4.12E-02       | 1.55      |
| MAMDC2             | 4.88E-02       | 1.55      |
| DAPK1              | 2.57E-02       | 1.55      |
| RARB               | 2.12E-02       | 1.54      |
| PADI1              | 4.00E-02       | 1.54      |
| PPIAL4A            | 2.08E-03       | 1.52      |
| FXVD6              | 3.71E-02       | 1.51      |
| KL                 | 3.88E-02       | 1.51      |
| AP006621.5         | 3.32E-02       | 1.51      |
| ANK1               | 2.46E-02       | 1.50      |
| GOLGA8N            | 1.07E-02       | 1.50      |
| UNC5B              | 5.49E-03       | 1.49      |
| C6orf223           | 1.71E-02       | 1.49      |
| ADORA1             | 4.82E-02       | 1.48      |
| NAALADL2           | 2.91E-02       | 1.48      |
| CLIC5              | 4.80E-02       | 1.47      |
| PTPRR              | 1.88E-02       | 1.46      |
| TCP11L2            | 2.20E-02       | 1.46      |
| FOXN4              | 3.95E-02       | 1.46      |
| ESRG               | 4.99E-02       | 1.45      |
| MEOX1              | 4.63E-02       | 1.45      |
| HMBOX1             | 4.37E-02       | 1.44      |
| NBEA               | 3.93E-02       | 1.44      |
| SATB1              | 3.94E-02       | 1.43      |
| KIAA1211           | 2.84E-02       | 1.43      |
| NRG4               | 2.59E-02       | 1.42      |
| ANXA9              | 3.35E-02       | 1.41      |
| TMEM51-AS1         | 1.56E-02       | 1.41      |
| RIC3               | 2.54E-02       | 1.40      |
| STEAP4             | 3.60E-02       | 1.39      |
| PLCE1              | 1.83E-02       | 1.39      |
| ST8SIA4            | 3.16E-02       | 1.39      |
| SYNE1              | 4.59E-02       | 1.39      |
| ABO                | 1.72E-02       | 1.36      |
| SCAPER             | 3.82E-02       | 1.36      |
| SDR16C5            | 4.59E-02       | 1.36      |
| MIR31HG            | 1.55E-02       | 1.35      |
| DDX11L2            | 4.17E-02       | 1.34      |
| INPP5D             | 3.01E-02       | 1.34      |
| Y_RNA              | 3.76E-02       | 1.34      |
| KIAA1217           | 3.10E-02       | 1.34      |
| HECA               | 3.75E-02       | 1.34      |
| NMNAT2             | 4.20E-02       | 1.33      |
| MYO7A              | 2.99E-02       | 1.33      |
| TRIM45             | 3.32E-02       | 1.33      |
| ATP7A              | 3.01E-02       | 1.32      |
| C22orf23           | 4.85E-02       | 1.32      |
| BTN3A3             | 4.42E-02       | 1.32      |
| ATP2B4             | 3.17E-02       | 1.31      |
| PDE5A              | 4.59E-02       | 1.31      |
| RAPGEFL1           | 4.72E-02       | 1.30      |

**Supplementary table 2B. Significantly downregulated mRNAs in miR-146a inhibitor treated SZ95 sebocytes (72 hours)**

FC: fold-change value

| <b>Gene symbol</b> | <b>p-value</b> | <b>FC</b> | <b>Gene symbol</b> | <b>p-value</b> | <b>FC</b> |
|--------------------|----------------|-----------|--------------------|----------------|-----------|
| ZNF527             | 4.79E-02       | -1.29     | VGF                | 9.21E-03       | -1.69     |
| WDR49              | 2.13E-02       | -1.32     | EGR2               | 3.90E-02       | -1.70     |
| LRP5L              | 4.87E-02       | -1.33     | 7SK                | 4.85E-03       | -1.71     |
| SERPINB2           | 4.50E-02       | -1.33     | IL18BP             | 1.76E-02       | -1.73     |
| PTCD1              | 4.07E-02       | -1.33     | CTD-2510F5.6       | 2.03E-03       | -1.73     |
| HIST2H2AA4         | 3.14E-02       | -1.33     | ADAMTS9            | 3.34E-04       | -1.73     |
| ISL2               | 2.69E-02       | -1.34     | CNPY2              | 1.37E-02       | -1.74     |
| HIST2H2AA3         | 3.95E-02       | -1.34     | GAS6-AS1           | 4.11E-02       | -1.75     |
| AP4S1              | 2.01E-02       | -1.37     | FZD8               | 2.78E-03       | -1.75     |
| PHLDA2             | 4.18E-02       | -1.38     | TDO2               | 1.05E-03       | -1.76     |
| SIX2               | 2.26E-02       | -1.39     | SPRR3              | 3.21E-02       | -1.77     |
| ZNF653             | 3.69E-02       | -1.40     | TBX15              | 1.09E-03       | -1.77     |
| SERTAD1            | 3.06E-02       | -1.41     | FZD9               | 2.86E-02       | -1.78     |
| LENG9              | 4.29E-02       | -1.41     | QRICH2             | 2.40E-02       | -1.78     |
| AC004466.1         | 4.35E-02       | -1.42     | MPL                | 3.57E-02       | -1.78     |
| PRR9               | 2.44E-02       | -1.43     | PCDHAC1            | 1.26E-02       | -1.80     |
| HIST2H4B           | 1.09E-02       | -1.44     | SNORD78            | 1.87E-03       | -1.80     |
| SHOX2              | 2.08E-02       | -1.45     | HIST1H2BN          | 3.60E-02       | -1.81     |
| SLC34A3            | 6.72E-03       | -1.45     | C19orf80           | 4.35E-02       | -1.85     |
| HIST2H4A           | 1.07E-02       | -1.45     | NOSTRIN            | 6.29E-03       | -1.86     |
| RP13-996F3.4       | 1.48E-02       | -1.47     | GGTLC2             | 6.52E-03       | -1.87     |
| AC003002.4         | 2.81E-02       | -1.47     | HIST1H2BH          | 1.76E-02       | -1.88     |
| HAS3               | 4.15E-02       | -1.47     | LINC00562          | 5.00E-02       | -1.88     |
| ACRC               | 1.87E-02       | -1.47     | PTPRZ1             | 2.21E-02       | -1.91     |
| TMEM200A           | 1.22E-02       | -1.48     | ARHGAP22           | 3.99E-05       | -1.92     |
| MIR17HG            | 6.55E-03       | -1.48     | INSRR              | 3.75E-02       | -1.93     |
| KCNMA1             | 3.77E-02       | -1.49     | ZCCHC18            | 2.22E-02       | -1.97     |
| CCDC85A            | 2.08E-02       | -1.49     | HAPLN2             | 2.39E-02       | -1.98     |
| ANKRD16            | 2.22E-02       | -1.50     | SNORD46            | 1.30E-02       | -2.00     |
| TRBJ2-7            | 4.81E-02       | -1.51     | CCL26              | 5.88E-04       | -2.00     |
| TWIST1             | 3.27E-03       | -1.52     | CPNE4              | 2.89E-02       | -2.01     |
| MIR663A            | 2.06E-02       | -1.53     | PPP1R1C            | 1.17E-02       | -2.03     |
| FAM183A            | 1.96E-02       | -1.53     | FOXP1-IT1          | 1.76E-02       | -2.03     |
| ACTL10             | 2.71E-02       | -1.53     | MUC6               | 1.17E-02       | -2.03     |
| KLHL35             | 4.88E-02       | -1.54     | FGF1               | 8.77E-03       | -2.04     |
| P2RY1              | 2.64E-02       | -1.55     | SPINK5             | 3.17E-02       | -2.04     |
| U3                 | 1.56E-02       | -1.57     | AKR7L              | 3.34E-02       | -2.05     |
| SERTAD4-AS1        | 9.79E-03       | -1.58     | FGF18              | 3.99E-02       | -2.06     |
| HBA1               | 3.91E-02       | -1.59     | PRKD1              | 4.29E-02       | -2.07     |
| VAC14-AS1          | 1.03E-02       | -1.60     | AC025287.1         | 5.74E-04       | -2.08     |
| TBR1               | 1.79E-03       | -1.61     | EBF4               | 3.93E-02       | -2.10     |
| G0S2               | 5.73E-03       | -1.61     | PDZD9              | 2.82E-02       | -2.11     |
| CXCL1              | 4.64E-02       | -1.64     | FAAH2              | 3.97E-02       | -2.13     |
| FERMT3             | 2.68E-02       | -1.64     | AC006435.1         | 3.86E-02       | -2.18     |
| GPT                | 7.46E-03       | -1.65     | HIST1H2BO          | 2.08E-02       | -2.20     |
| AC006014.1         | 2.47E-02       | -1.66     | ANXA13             | 1.21E-02       | -2.22     |
| FJX1               | 8.73E-03       | -1.67     | OVOL3              | 3.47E-02       | -2.26     |
| PCP4L1             | 2.34E-02       | -1.67     | FLT4               | 1.34E-02       | -2.27     |
| LINC00176          | 2.59E-02       | -1.67     | SNORD67            | 4.73E-02       | -2.28     |
| IL23A              | 1.26E-02       | -1.68     | USP17L2            | 3.83E-03       | -2.29     |
| RADIL              | 4.47E-04       | -1.69     | CTSW               | 2.39E-02       | -2.32     |

| <b>Gene symbol</b> | <b>p-value</b> | <b>FC</b> |
|--------------------|----------------|-----------|
| GRASP              | 1.69E-02       | -2.34     |
| FAM153A            | 4.77E-02       | -2.34     |
| GJA1               | 2.88E-02       | -2.36     |
| SLA2               | 7.48E-03       | -2.38     |
| PCDH10             | 2.39E-02       | -2.41     |
| NKX2-5             | 4.08E-02       | -2.41     |
| IL18RAP            | 4.35E-03       | -2.42     |
| SNORA3             | 4.97E-02       | -2.43     |
| FCGR1A             | 7.66E-03       | -2.44     |
| ZNRF3-AS1          | 1.57E-02       | -2.47     |
| MADCAM1            | 4.65E-02       | -2.48     |
| LHX5               | 3.06E-02       | -2.50     |
| SHROOM4            | 9.66E-04       | -2.50     |
| NOX1               | 6.42E-03       | -2.53     |
| ETNPPL             | 3.16E-02       | -2.54     |
| HAVCR2             | 1.27E-05       | -2.57     |
| SLC36A2            | 8.46E-03       | -2.64     |
| RUNDC3B            | 2.84E-02       | -2.68     |
| AXDND1             | 3.61E-02       | -2.69     |
| DNAJB13            | 1.01E-02       | -2.70     |
| GRM8               | 4.92E-02       | -2.74     |
| TTC40              | 2.37E-02       | -2.79     |
| C20orf26           | 4.98E-02       | -2.80     |
| CACNA1B            | 7.03E-03       | -2.81     |
| LRRC66             | 3.86E-02       | -2.83     |
| SULT1B1            | 6.99E-03       | -2.91     |
| JAM2               | 4.81E-03       | -3.00     |
| AMN                | 2.98E-03       | -3.03     |
| CYP2E1             | 8.47E-03       | -3.03     |
| PNLIPRP2           | 2.00E-02       | -3.06     |
| CRHBP              | 1.18E-05       | -3.16     |
| CCDC144NL          | 1.81E-02       | -3.21     |
| DNALI1             | 1.36E-02       | -3.26     |
| MIR3614            | 4.74E-02       | -3.27     |
| LHX3               | 3.39E-02       | -3.61     |
| ZNF80              | 6.95E-03       | -3.61     |
| ABCB6              | 2.22E-04       | -3.68     |
| LPPR5              | 3.30E-04       | -3.69     |
| PAX5               | 4.40E-03       | -3.76     |
| LDLRAD2            | 1.52E-03       | -3.76     |
| SLC24A3            | 1.06E-02       | -3.79     |
| SNORD23            | 3.96E-04       | -4.58     |
| MTOR-AS1           | 1.00E-04       | -10.88    |
